# Supplementary material for: Asymmetrical reliability of the Alda score favours a dichotomous representation of lithium responsiveness
Source: PLoS One. 2020 Jan 27;15(1):e0225353. doi: 10.1371/journal.pone.0225353 (PMC6984707; doi:10.1371/journal.pone.0225353)
Supplement: S2 File — Inter-rater reliability data for the Alda A-score. (CSV) [file pone.0225353.s004.csv]

site	Site	rater	Case 1	Case 2	Case 3	Case 4	Case 5	Case 6	Case 7	Case 8	Case 9	Case 10	Case 11	Case 12
Consensus	Consensus	GOLD	9	9	7	7	10	4	7	9	5	9	6	3
Centre 1	Centre 1	R1	9	9	6	7	9	1	5	9	7	9	7	1
Centre 1	Centre 1	R2	10	9	8	8	10	5	8	9	7	10	6	2
Centre 1	Centre 1	R3	9	9	7	6	10	5	7	9	8	9	7	4
Centre 1	Centre 1	R4	9	9	8	8	10	6	7	9	6	10	7	5
Centre 1	Centre 1	R5	9	8	7	7	10	5	8	9	9	10	9	3
Centre 1	Centre 1	R6	9	8	9	8	10	5	8	9	8	10	6	3
Centre 1	Centre 1	R7	9	8	6	6	10	5	6	9	3	9	6	4
Centre 1	Centre 1	R8	9	8	7	7	10	5	6	9	7	9	8	3
Centre 1	Centre 1	R9	9	9	8	7	10	3	7	9	4	9	6	4
Centre 2	Centre 2	R1	9	9	9	8	10	4	9	8	7	9	6	4
Centre 2	Centre 2	R2	7	8	8	8	8	7	7	8	7	9	5	5
Centre 2	Centre 2	R3	10	9	8	6	10	5	6	9	7	9	4	5
Centre 2	Centre 2	R4	9	9	7	7	10	5	9	9	2	8	9	5
Centre 3	Centre 3	R1	10	9	6	6	10	6	9	9	9	8	6	8
Centre 3	Centre 3	R2	10	10	7	7	10	6	8	9	7	8	6	7
Centre 4	Centre 4	R1	9	8	6	5	10	5	7	9	8	10	8	5
Centre 4	Centre 4	R2	9	8	6	5	8	0	9	9	5	7	6	0
Centre 5	Centre 5	R1	9	9	8	8	10	5	5	9	6	9	7	4
Centre 5	Centre 5	R2	9	9	5	4	10	0	5	8	0	8	7	0
Centre 5	Centre 5	R3	9	8	6	7	8	2	8	9	2	9	5	4
Centre 5	Centre 5	R4	9	8	5	7	10	5	7	9	5	8	9	4
Centre 6	Centre 6	R1	7	7	5	7	8	4	7	9	3	8	7	3
Centre 6	Centre 6	R2	10	8	6	6	10	3	7	9	4	8	6	1
Centre 7	Centre 7	R1	9	9	6	7	10	6	9	9	7	8	8	6
Centre 7	Centre 7	R2	9	9	6	7	10	6	8	9	6	9	8	6
Centre 7	Centre 7	R3	9	9	7	7	10	6	8	9	7	8	8	7
Centre 8	Centre 8	R1	9	8	8	7	10	8	9	10	9	6	9	8
Centre 8	Centre 8	R2	9	9	8	7	10	6	10	10	9	5	8	7
Centre 9	Centre 9	R1	9	8	8	7	10	6	10	9	6	10	8	1
Centre 9	Centre 9	R2	10	9	8	7	10	3	7	9	8	9	6	5
Centre 10	Centre 10	R1	10	9	6	6	10	1	7	9	7	9	9	7
Centre 10	Centre 10	R2	10	9	6	6	10	4	7	9	6	9	7	7
Centre 11	Centre 11	R1	8	9	6	7	10	4	6	8	4	8	4	4
Centre 12	Centre 12	R1	9	8	6	8	10	7	10	9	7	9	9	3
Centre 13	Centre 13	R1	9	9	6	8	10	5	8	9	6	9	9	3
Centre 14	Centre 14	R1	9	8	6	7	10	2	8	9	8	9	9	0
Centre 14	Centre 14	R2	9	9	7	8	10	9	8	9	5	9	9	4
Centre 14	Centre 14	R3	9	9	4	6	10	0	7	9	4	9	7	3
Centre 14	Centre 14	R4	9	8	7	6	9	3	6	9	2	9	5	3
Centre 14	Centre 14	R5	9	10	10	5	10	5	6	10	5	8	5	7
Centre 14	Centre 14	R6	9	9	6	7	10	5	9	9	8	9	9	3
Centre 14	Centre 14	R7	9	9	9	9	9	6	4	9	8	9	8	5
Centre 15	Centre 15	R1	8	8	7	8	9	4	8	9	7	9	5	2
Centre 15	Centre 15	R2	8	8	7	8	8	7	8	9	6	10	4	0
Centre 15	Centre 15	R3	8	8	7	8	9	6	8	9	6	9	6	0
Centre 15	Centre 15	R4	8	9	7	8	10	7	7	9	8	8	6	2
Centre 15	Centre 15	R5	8	8	7	8	9	7	8	9	8	9	8	3
Centre 15	Centre 15	R6	8	8	7	8	9	7	8	9	8	9	8	3
Centre 16	Centre 16	R1	9	9	8	7	10	5	8	9	9	10	4	4
Centre 16	Centre 16	R2	9	8	7	6	10	5	7	9	7	9	8	0
Centre 16	Centre 16	R3	9	8	7	7	10	5	10	9	7	8	9	3
Centre 17	Centre 17	R1	8	9	6	7	8	4	7	9	5	10	6	3
Centre 17	Centre 17	R2	9	9	7	7	8	4	6	9	5	10	4	5
Centre 17	Centre 17	R3	8	9	7	7	8	6	7	9	9	9	6	5
Centre 17	Centre 17	R4	9	9	7	7	7	6	5	9	9	9	4	6
Centre 18	Centre 18	R1	8	9	8	5	9	4	9	8	5	9	5	3
Centre 18	Centre 18	R2	9	9	7	6	10	7	8	9	4	9	8	3
Centre 18	Centre 18	R3	9	8	7	6	10	6	7	9	5	9	5	4
